# Supplementary material for: Circulating Concentrations of Key Regulators of Nitric Oxide Production in Undernourished Sheep Carrying Single and Multiple Fetuses
Source: PubMed Central journal article supplement (PMC7023428; doi:10.3390/ani10010065), 2019-12-30
Supplement: animals-10-00065-s001.pdf [file animals-10-00065-s001.pdf]

# Circulating Concentrations of Key Regulators of Nitric Oxide Production in Undernourished Sheep Carrying Single and Multiple Fetuses

Fiammetta Berlinguer <sup>1,\*</sup>, Cristian Porcu <sup>1</sup>, Giovanni Molle <sup>2</sup>, Andrea Cabiddu <sup>2</sup>, Maria Dattena <sup>2</sup>, Marilia Gallus <sup>2</sup>, Valeria Pasciu <sup>1</sup>, Sara Succu <sup>1</sup>, Francesca D. Sotgiu <sup>1</sup>, Panagiotis Paliogiannis <sup>3</sup>, Salvatore Sotgia <sup>3</sup>, Arduino A Mangoni <sup>4</sup>, Antonio Gonzalez-Bulnes <sup>5</sup>, Ciriaco Carru <sup>3</sup> and Angelo Zinellu <sup>3</sup>

**Table S1.** Intake of metabolizable energy and crude protein in control (14 singleton pregnancies, 12 twin pregnancies and 4 triplet pregnancies) and in feed-restricted pregnant ewes (11 singleton pregnancies, 15 twin pregnancies and 3 triplet pregnancies).

| Days From Mating | Intake of Metabolizable Energy<br>(Mcal/ewe day) |                 | Intake of Crude Protein<br>(g/ewe day) |                 |
|------------------|--------------------------------------------------|-----------------|----------------------------------------|-----------------|
|                  | Control                                          | Feed-restricted | Control                                | Feed-restricted |
| 24–100           | 2.96                                             | 1.26            | 186                                    | 116             |
| 101–114          | 3.64                                             | 1.59            | 229                                    | 146             |
| 115–128          | 3.56                                             | 1.98            | 224                                    | 182             |
| 129–142          | 3.49                                             | 2.20            | 219                                    | 203             |
| Overall Mean     | 3.17                                             | 1.50            | 199                                    | 138             |



**Table S2.** Live weights and body condition scores (BCS) at d 24 and d 140 of pregnancy in control (14 singleton pregnancies, 12 twin pregnancies and 4 triplet pregnancies) and in feed-restricted ewes (11 singleton pregnancies, 15 twin pregnancies and 3 triplet pregnancies).

| Variables        | Type of Pregnancy | Day 24 of pregnancy |                 |                | Day 140 of pregnancy |                 |                  | Control                         | Feed-restricted                 |
|------------------|-------------------|---------------------|-----------------|----------------|----------------------|-----------------|------------------|---------------------------------|---------------------------------|
|                  |                   | Controls            | Feed-restricted | <i>p</i> value | Controls             | Feed-restricted | <i>p</i> value   | d 24 vs d 140<br><i>p</i> value | d 24 vs d 140<br><i>p</i> value |
| Body weight (kg) | Singletons        | 48.0 ± 5.9          | 45.2 ± 9.0      | 0.38           | 60.1 ± 6.5           | 47.5 ± 7.6      | <i>p</i> < 0.001 | <i>p</i> < 0.05                 | 0.53                            |
|                  | Twins             | 48.6 ± 4.3          | 49.0 ± 7.0      | 0.85           | 62.2 ± 6.1           | 54.1 ± 6.6      | <i>p</i> < 0.005 | <i>p</i> < 0.001                | <i>p</i> < 0.05                 |
|                  | Triplets          | 43.7 ± 4.6          | 52.7 ± 3.4      | 0.06           | 58.0 ± 7.9           | 57.3 ± 4.9      | 0.90             | 0.07                            | 0.17                            |
| BCS              | Singletons        | 2.64 ± 0.25         | 2.65 ± 0.27     | 0.98           | 2.87 ± 0.27          | 2.46 ± 0.39     | 0.60             | <i>p</i> < 0.001                | 0.19                            |
|                  | Twins             | 2.75 ± 0.20         | 2.69 ± 0.24     | 0.49           | 2.77 ± 0.17          | 2.40 ± 0.15     | <i>p</i> < 0.001 | 0.71                            | <i>p</i> < 0.01                 |
|                  | Triplets          | 2.76 ± 0.12         | 2.64 ± 0.32     | 0.54           | 2.63 ± 0.26          | 2.13 ± 0.27     | 0.07             | 0.49                            | 0.06                            |

\

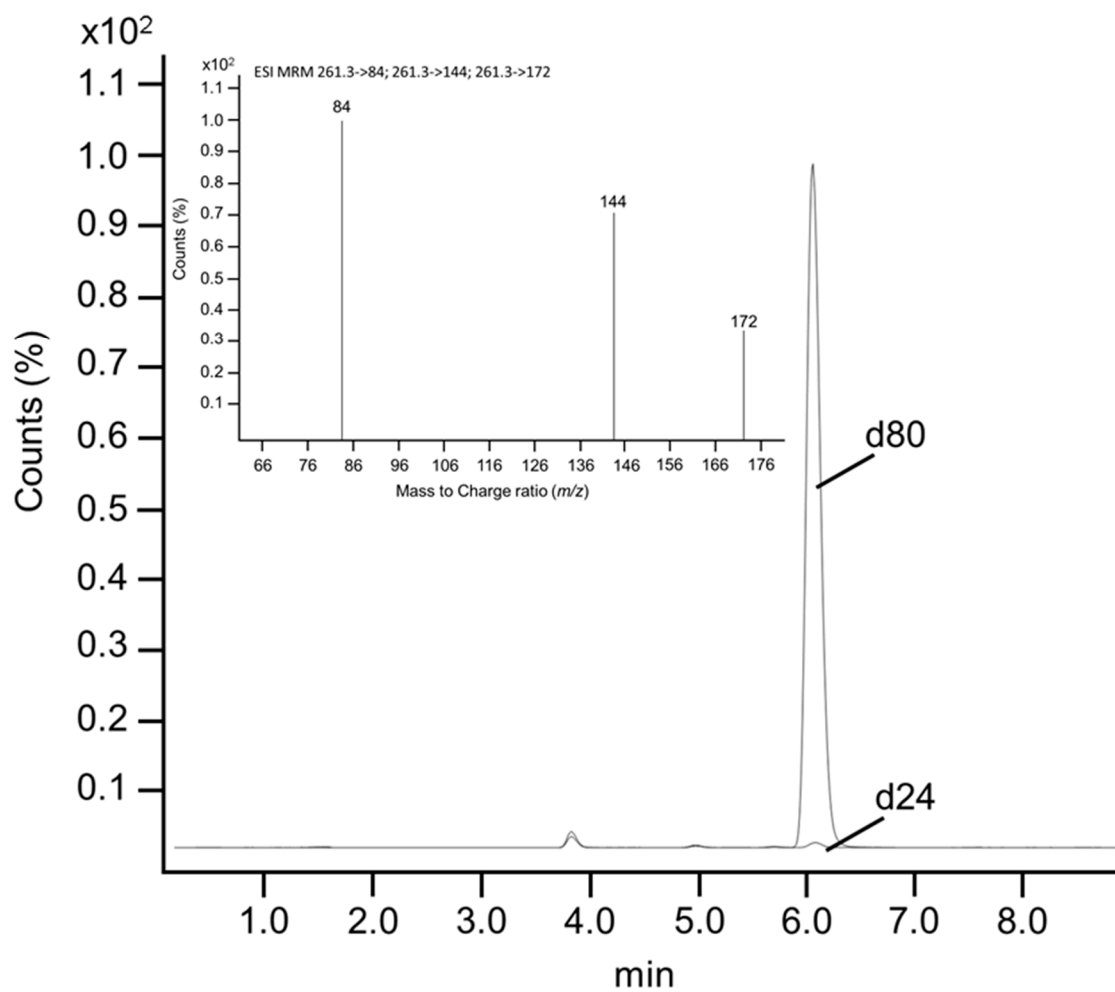

**Figure S1.** Representative chromatogram of a real sheep plasma sample at different withdrawn times (d24 and d80). Inset shows MS/MS spectra of derivatized homoarginine.
